# Supplementary material
Source: PubMed Central journal article supplement (PMC5971439)
Supplement: supp_RA117.000990_133955_2_supp_113251_p6rx1q.pdf [file supp_RA117.000990_133955_2_supp_113251_p6rx1q.pdf]

## Supporting information

### **Dimerization of the cellular prion protein inhibits propagation of scrapie prions**

Anna D. Engelke<sup>1\*§</sup>, Anika Gonsberg<sup>1\*</sup>, Simrika Thapa<sup>2\*</sup>, Sebastian Jung<sup>1</sup>, Sarah Ulbrich<sup>1</sup>, Ralf Seidel<sup>3</sup>, Shaon Basu<sup>4</sup>, Gerd Multhaup<sup>4</sup>, Michael Baier<sup>5</sup>, Martin Engelhard<sup>3</sup>, Hermann M. Schätzl<sup>2</sup>, Konstanze F. Winklhofer<sup>6</sup> and Jörg Tatzelt<sup>1#</sup>

<sup>1</sup>Department Biochemistry of Neurodegenerative Diseases, Institute of Biochemistry and Pathobiochemistry, Ruhr University Bochum, D-44801 Bochum, Germany; <sup>2</sup>Department of Comparative Biology and Experimental Medicine, Faculty of Veterinary Medicine, University of Calgary, Calgary AB T2N 4Z6, Canada; <sup>3</sup>Department of Structural Biochemistry, Max Planck Institute of Molecular Physiology, D- 44227 Dortmund, Germany; <sup>4</sup>Department of Pharmacology and Therapeutics, McGill University, Montreal H3G 1Y6, Canada; <sup>5</sup>Research Group Proteinopathies/Neurodegenerative Diseases, Centre for Biological Threats and Special Pathogens (ZBS6), Robert Koch-Institut, D-13353 Berlin, Germany; <sup>6</sup>Department Molecular Cell Biology, Institute of Biochemistry and Pathobiochemistry, Ruhr University Bochum, D-44801 Bochum, Germany

\*contributed equally and share first authorship

§Present address: Department of Neurology, Medical Faculty, Heinrich-Heine Universität, D-40225 Düsseldorf, Germany.

Contents:

Figure S1: Mutation of serine 132 does not significantly interfere with propagation of PrP<sup>Sc</sup>

**A**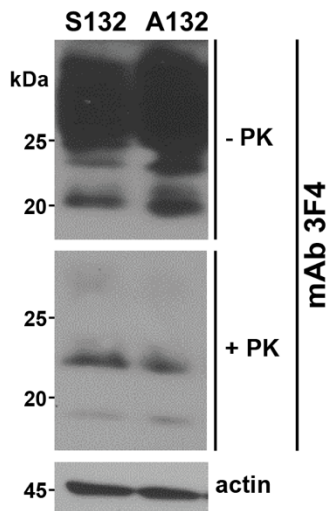**B**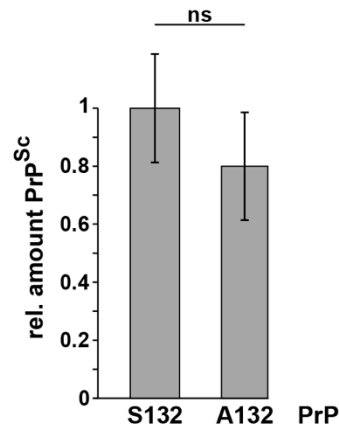**Figure S1****FIGURE S1. Mutation of serine 132 does not significantly interfere with propagation of PrP<sup>Sc</sup>.**

(A) Persistently infected 22L-ScN2a cells were transiently transfected with wtPrP<sup>C</sup> (S132) or a variant in which S132 was replaced by alanine (A132). Cell lysates were prepared and subjected to PK digestion (+PK) or left untreated (-PK) prior to the immunoblot analysis using the monoclonal anti-PrP antibody 3F4 to exclusively detect the transfected PrP but not endogenous PrP. (B) Quantitative analysis of the amount of 3F4-positive PK-resistant PrP<sup>Sc</sup> in transfected 22L-ScN2a cells. PrP<sup>Sc</sup> was measured densitometrically using ImageJ software. The relative amount of PrP<sup>Sc</sup> present in cells expressing wtPrP<sup>C</sup> was set as 1. Data represent mean  $\pm$  SD of 4 independent experiments.
